# Supplementary material for: The Hedgehog co-receptor BOC differentially regulates SHH signaling during craniofacial development
Source: Oxford University Press journal article supplement (doi:10.1242/dev.189076), 2020-01-01
Supplement: dev189076supp.pdf [file dev189076supp.pdf]

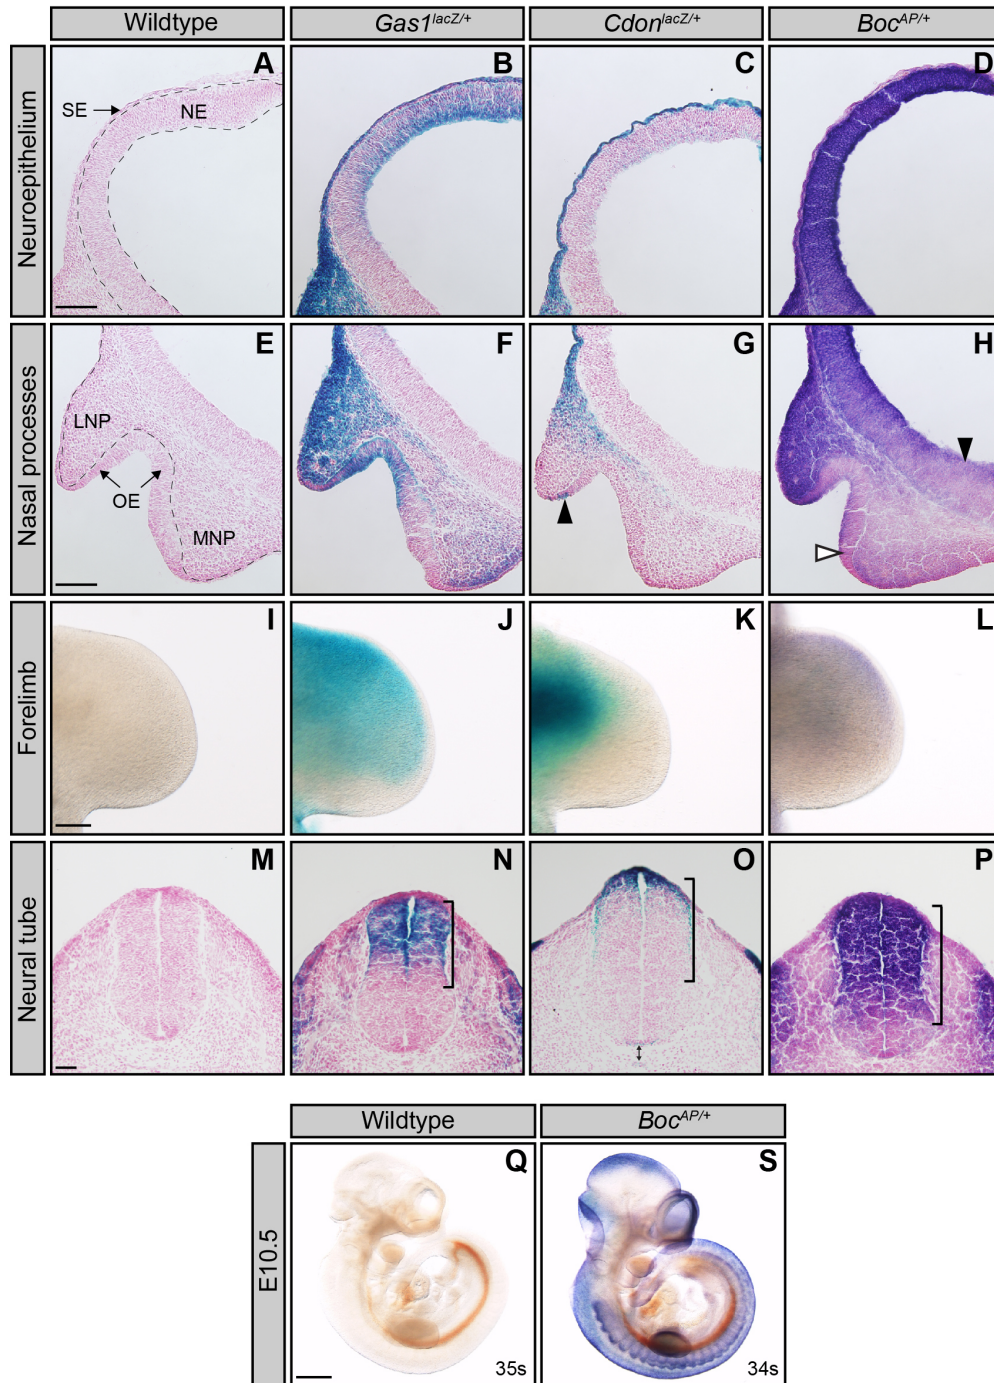

**Figure S1. *Gas1*, *Cdon* and *Boc* are differentially expressed across multiple HH-responsive tissues.**

Analysis of HH co-receptor expression using *lacZ* (*Gas1*, *Cdon*) and *hPLAP* (*Boc*) reporter alleles in HH-responsive tissues (A-P). High magnification pictures of coronal sections of E10.5 forebrains (A-H; cf. Fig.1Q-T), from wildtype (A, E), *Gas1<sup>lacZ/+</sup>* (B, F), *Cdon<sup>lacZ/+</sup>* (C, G), and *Boc<sup>AP/+</sup>* (D, H) embryos are shown. E10.5 forebrain neuroepithelia (A-D) and nasal processes (E-H). Arrowhead in (G) denotes a subset of cells expressing *Cdon* in the olfactory epithelium. Black arrowhead in (H) identifies the extended ventral expression of *Boc* closer to the telencephalon source of *Shh* expression. White arrowhead in (H) denotes *Boc* expression in the

olfactory epithelium. Whole mount X-Gal and Alkaline Phosphatase staining of E10.5 forelimb buds (I-L) from wildtype (I), *Gas1<sup>lacZ/+</sup>* (J), *Cdon<sup>lacZ/+</sup>* (K), and *Boc<sup>AP/+</sup>* (L) embryos. Transverse sections of E10.5 neural tubes (M-P) from wildtype (M), *Gas1<sup>lacZ/+</sup>* (N), *Cdon<sup>lacZ/+</sup>* (O), and *Boc<sup>AP/+</sup>* (P) embryos. Black brackets denote the expression domain of the HH co-receptors in the neural tube. Double-headed arrow in (O) indicates *Cdon* expression in the floor plate and notochord. Heat inactivation of endogenous alkaline phosphatase at E10.5 in wildtype (Q) and *Boc<sup>AP/+</sup>* (S) animals demonstrates the specificity of alkaline phosphatase staining. Somite number (s) is indicated in the lower right corner (Q-S). Scale bars, (A-H) 100 $\mu$ m, (I-L) 200 $\mu$ m, (M-P) 50 $\mu$ m, (Q-S) 500 $\mu$ m. Abbreviations: surface ectoderm (SE), neuroepithelium (NE), lateral nasal process (LNP), medial nasal process (MNP), olfactory epithelium (OE).

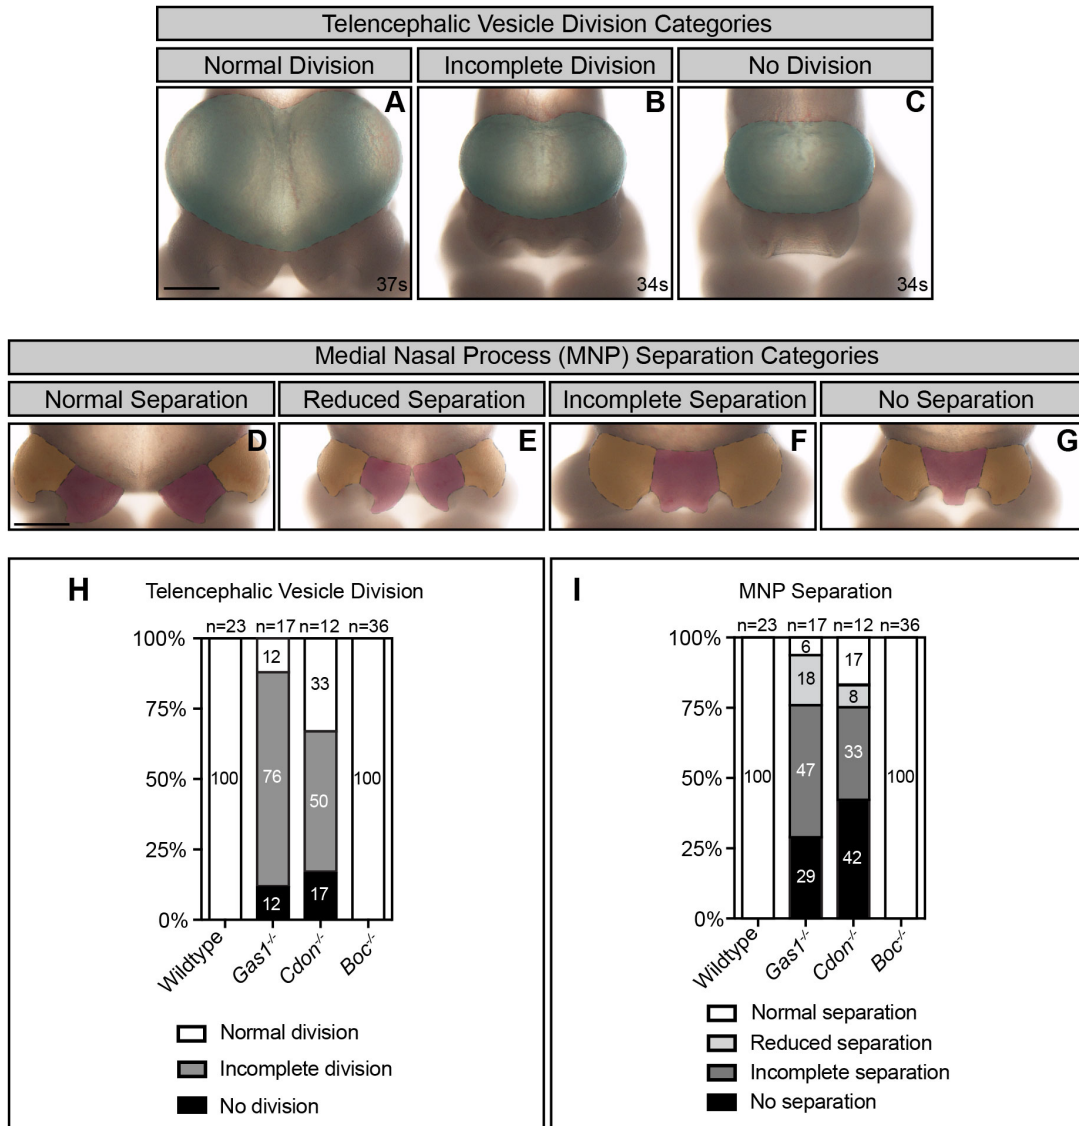

**Figure S2. Telencephalic vesicle division and MNP separation in *Gas1*, *Cdon* and *Boc* mutants.**

*En face* view of E10.5 embryos (A-C). The telencephalic vesicles are pseudocolored in green and surrounded by a dotted line. Telencephalic vesicle division classification categories: normal division (A), incomplete division (B), no division (C). Midface view of E10.5 embryos (D-G). The lateral and medial nasal processes are pseudocolored in orange and red, respectively, and are surrounded by a dotted line. Medial nasal process (MNP) classification categories: normal separation (D), reduced separation (E), incomplete separation (F), and no separation (G). Scale bars (A, D), 500 $\mu$ m. Telencephalic vesicle (TV) division frequency in E10.5 wildtype (n=23), *Gas1*<sup>-/-</sup> (n=17), *Cdon*<sup>-/-</sup> (n=12), and *Boc*<sup>-/-</sup> (n=36) embryos (H). Medial nasal process (MNP) separation frequency in E10.5 wildtype (n=23), *Gas1*<sup>-/-</sup> (n=17), *Cdon*<sup>-/-</sup> (n=12), and *Boc*<sup>-/-</sup> (n=36) embryos (I).

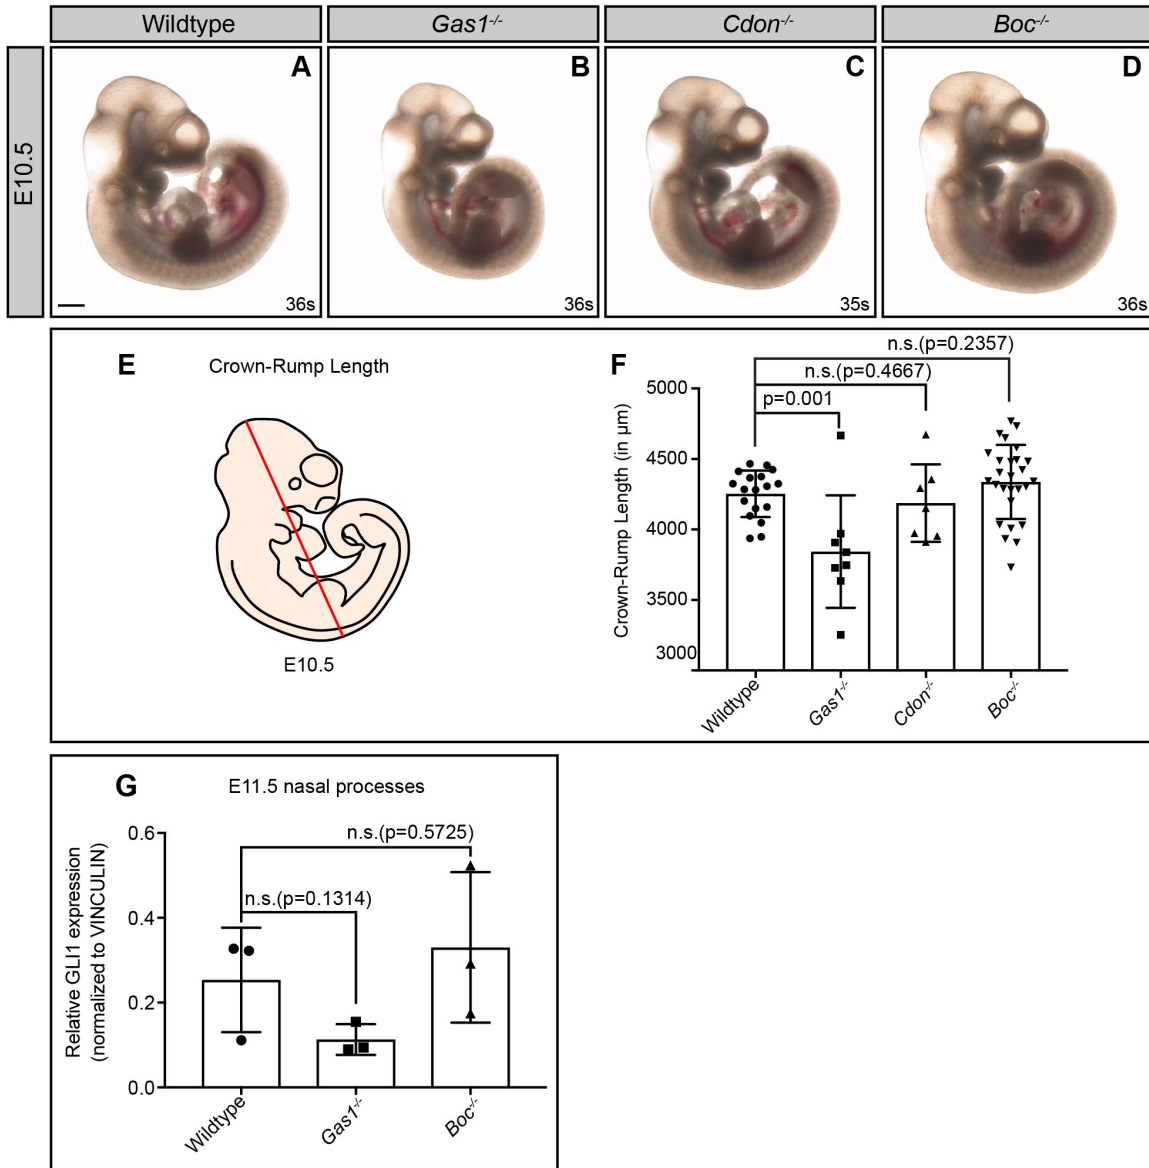

**Figure S3. Reduced embryo size in E10.5 *Gas1*, but not *Cdon* or *Boc*, mutant embryos.** Sagittal views of E10.5 wildtype (A), *Gas1*<sup>-/-</sup> (B), *Cdon*<sup>-/-</sup> (C), and *Boc*<sup>-/-</sup> (D) embryos. Scale bar (A), 500  $\mu\text{m}$ . Schematic sagittal view of an E10.5 mouse embryo (E); the red diagonal line denotes crown-rump length. Crown-rump length quantitation of E10.5 wildtype (n= 18), *Gas1*<sup>-/-</sup> (n=8), *Cdon*<sup>-/-</sup> (n=7), *Boc*<sup>-/-</sup> (n=27) embryos (F). Quantitation of GLI1 levels in nasal processes isolated from E11.5 wildtype (n=3), *Gas1*<sup>-/-</sup> (n=3) and *Boc*<sup>-/-</sup> (n=3) embryos (G). Data are mean  $\pm$  s.d. P-values were determined by a two-tailed Student's *t*-test. The Bonferroni correction was employed to account for multiple comparisons in each dataset; (F) non-significant (n.s.;  $p>0.0166$ ), significant ( $p\leq 0.0166$ ) and (G) non-significant (n.s.;  $p>0.0250$ ), significant ( $p\leq 0.0250$ ).

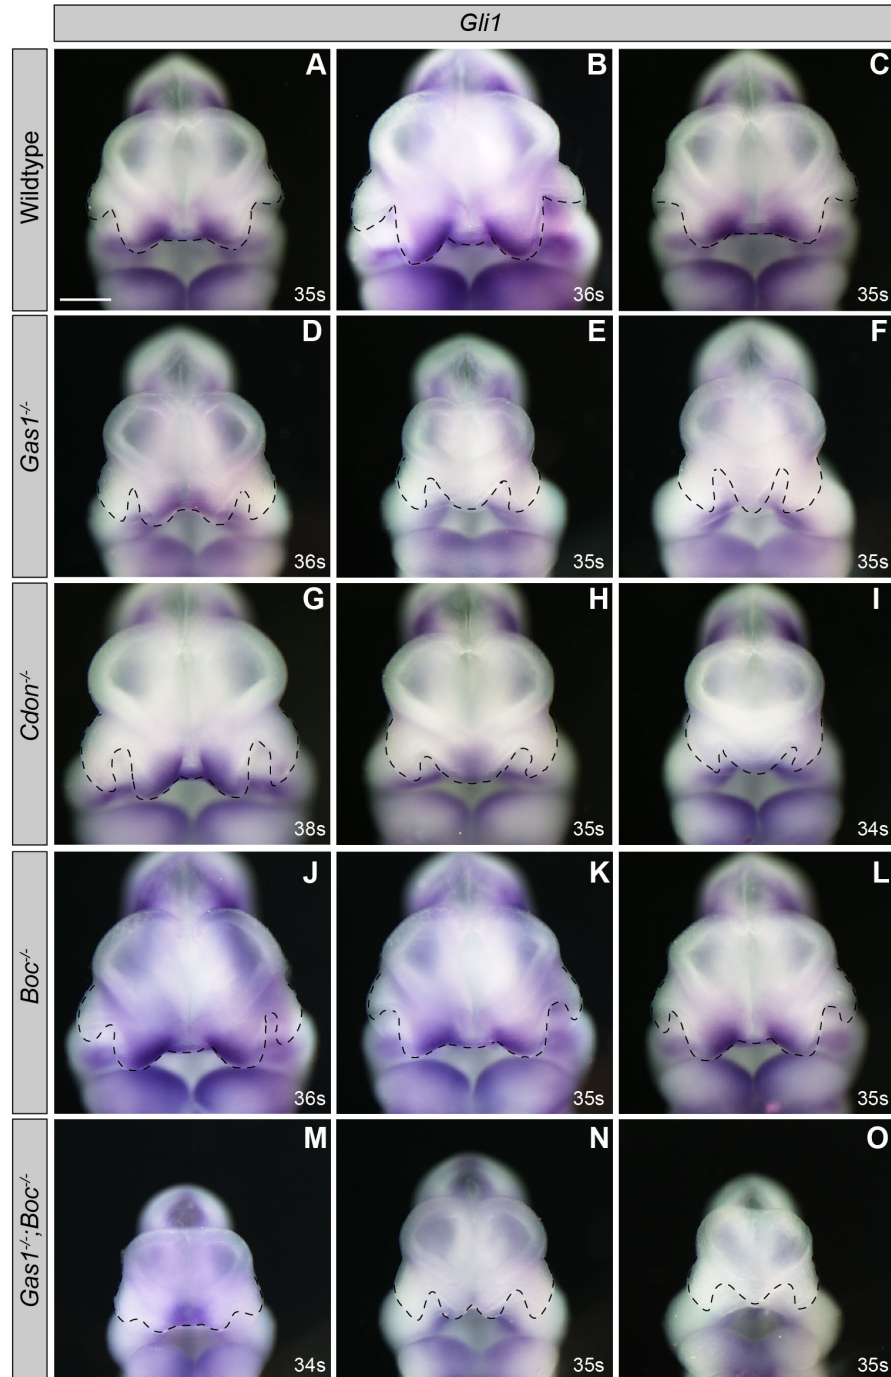

**Figure S4. The spectrum of HPE phenotypes correlates with changes in *Gli1* expression.**

*In situ* hybridization detection of *Gli1* expression in E10.5 forebrains (A-O). *En face* views of E10.5 forebrains from wildtype (A-C), *Gas1*<sup>-/-</sup> (D-F), *Cdon*<sup>-/-</sup> (G-I), *Boc*<sup>-/-</sup> (J-L) and *Gas1*<sup>-/-</sup>;*Boc*<sup>-/-</sup> (M-O) embryos are shown. Somite number (s) is indicated in the lower right corner of each panel. Black dotted lines outline nasal processes. Notice that as the HPE phenotypes worsen (from left to right) in *Gas1* and *Cdon* mutants, the expression of *Gli1* in the MNP is lost. *Boc* mutants display equal levels of *Gli1* in the MNP and do not display any gross craniofacial defects. *Gas1*;*Boc* double mutants with ameliorated craniofacial defects (from left to right) maintain *Gli1* expression in the MNP, while *Gli1* expression is lost in mutants that display severe craniofacial defects. Scale bars (A-O), 500  $\mu$ m.

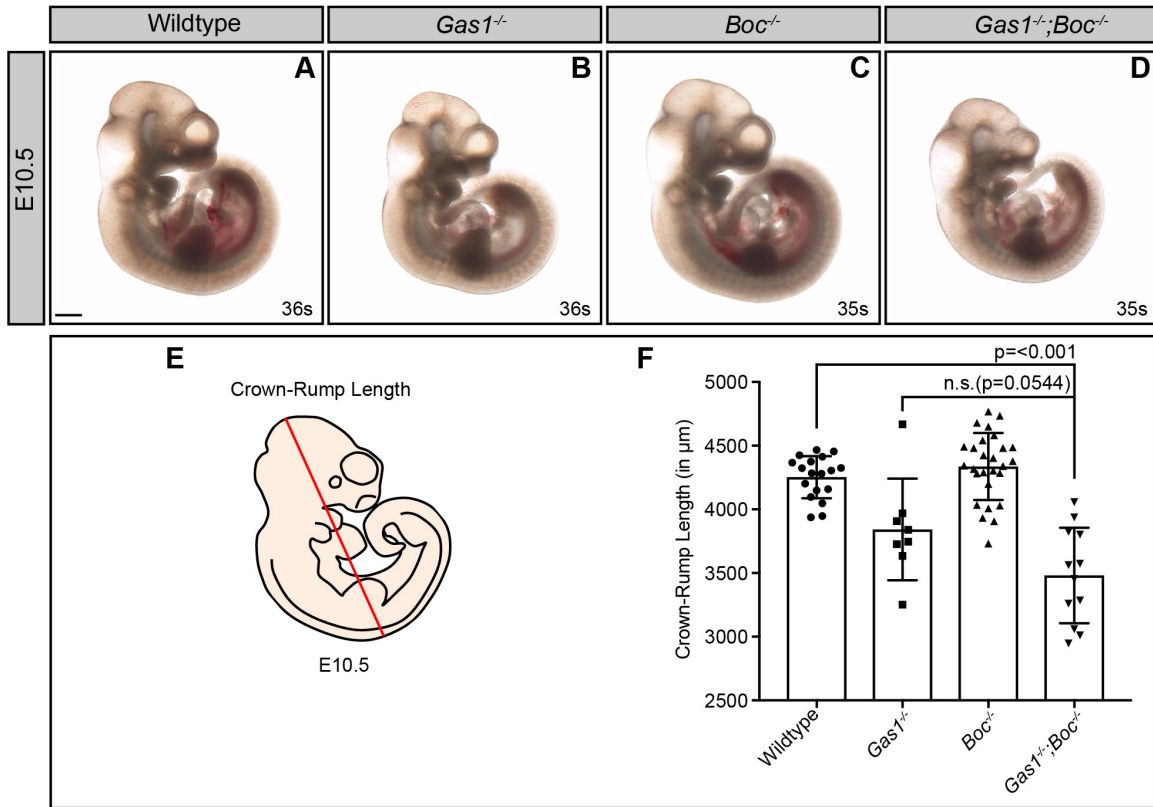

**Figure S5. Reduced Crown-Rump Length in E10.5 *Gas1*;*Boc* double mutant embryos.** Sagittal view of E10.5 wildtype (A), *Gas1*<sup>-/-</sup> (B), *Boc*<sup>-/-</sup> (C), and *Gas1*<sup>-/-</sup>;*Boc*<sup>-/-</sup> (D) embryos. Schematic sagittal view of an E10.5 mouse embryo; the red diagonal line denotes the crown-rump length (E). Crown-rump length quantitation in wildtype (n= 18), *Gas1*<sup>-/-</sup> (n=8), *Boc*<sup>-/-</sup> (n=27), and *Gas1*<sup>-/-</sup>;*Boc*<sup>-/-</sup> (n=12) embryos (F). Scale bar in A, 500µm. Data are mean±s.d. P-values were determined by a two-tailed Student's *t*-test. The Bonferroni correction was employed to account for multiple comparisons in each dataset; (F) non-significant (n.s.;  $p > 0.0250$ ), significant ( $p \leq 0.0250$ ).

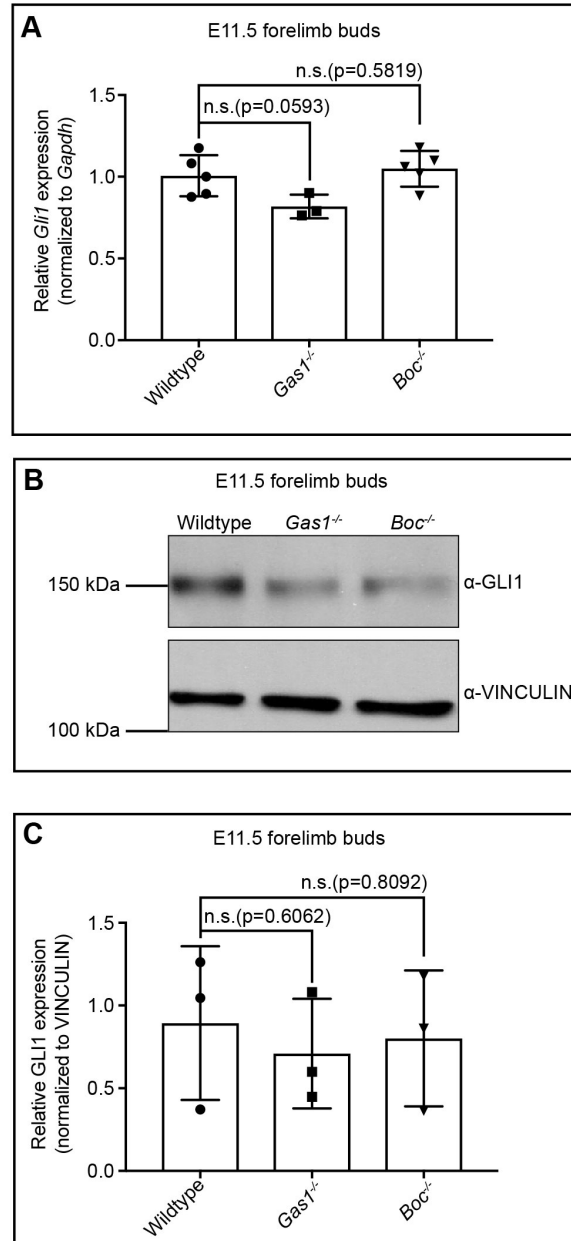

**Figure S6. *Gli1* mRNA and protein levels in E10.5 *Gas1* and *Boc* mutant forelimb buds.**

Relative expression of *Gli1* by qRT-PCR in forelimb buds (A) of E11.5 wildtype (n=5), *Gas1*<sup>-/-</sup> (n=3) and *Boc*<sup>-/-</sup> (n=5) embryos normalized to *Gapdh*. Biological replicates were analyzed in triplicate. Western blot analysis of GLI1 endogenous protein in forelimb buds (B). Anti-VINCULIN was used as loading control, three biological replicates were analyzed.

Quantitation of GLI1 levels in forelimb buds (C) of E11.5 wildtype (n=3), *Gas1*<sup>-/-</sup> (n=3) and *Boc*<sup>-/-</sup> (n=3) embryos. Data are mean±s.d. P-values were determined by a two-tailed Student's *t*-test. The Bonferroni correction was employed to account for multiple comparisons in each dataset; (A,C) non-significant (n.s.;  $p > 0.0250$ ), significant ( $p \leq 0.0250$ ).

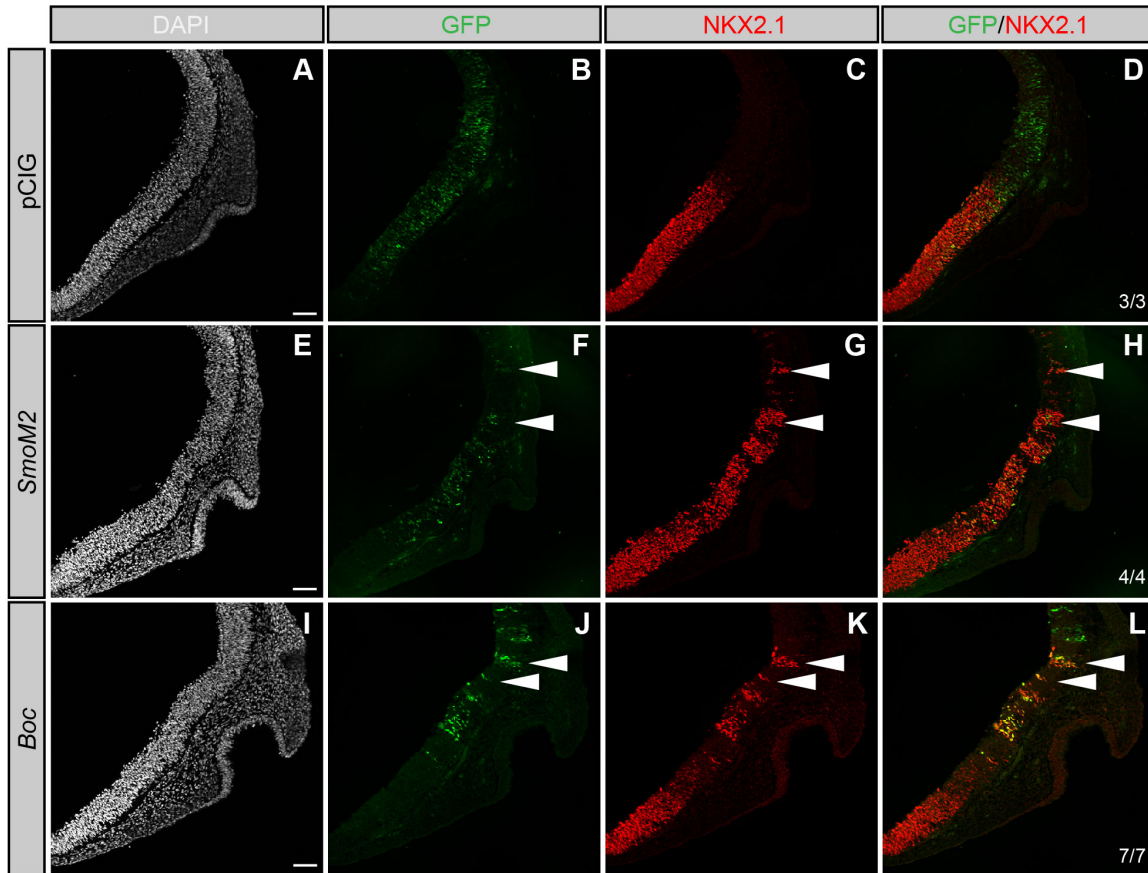

**Figure S7. *Boc* promotes HH-dependent neural patterning in the developing chicken forebrain.** Coronal sections of Hamburger-Hamilton stage 21-22 chicken forebrains electroporated with empty vector (pCIG; A-D), *SmoM2* (E-H), and *Boc* (I-L). DAPI (grayscale; A,E,I) denotes nuclei. GFP+ cells (green; B,F,J) identify electroporated cells. Antibody detection of NKX2.1 (red; C,G,K) reads out HH pathway activity. Merged images are shown in (D,H,L). The number of electroporated embryos that display ectopic NKX2.1 expression is indicated in the lower right corner (D,H,L). White arrowheads highlight ectopic NKX2.1 expression. Scale bars in A, E, and I, 50 $\mu$ m.



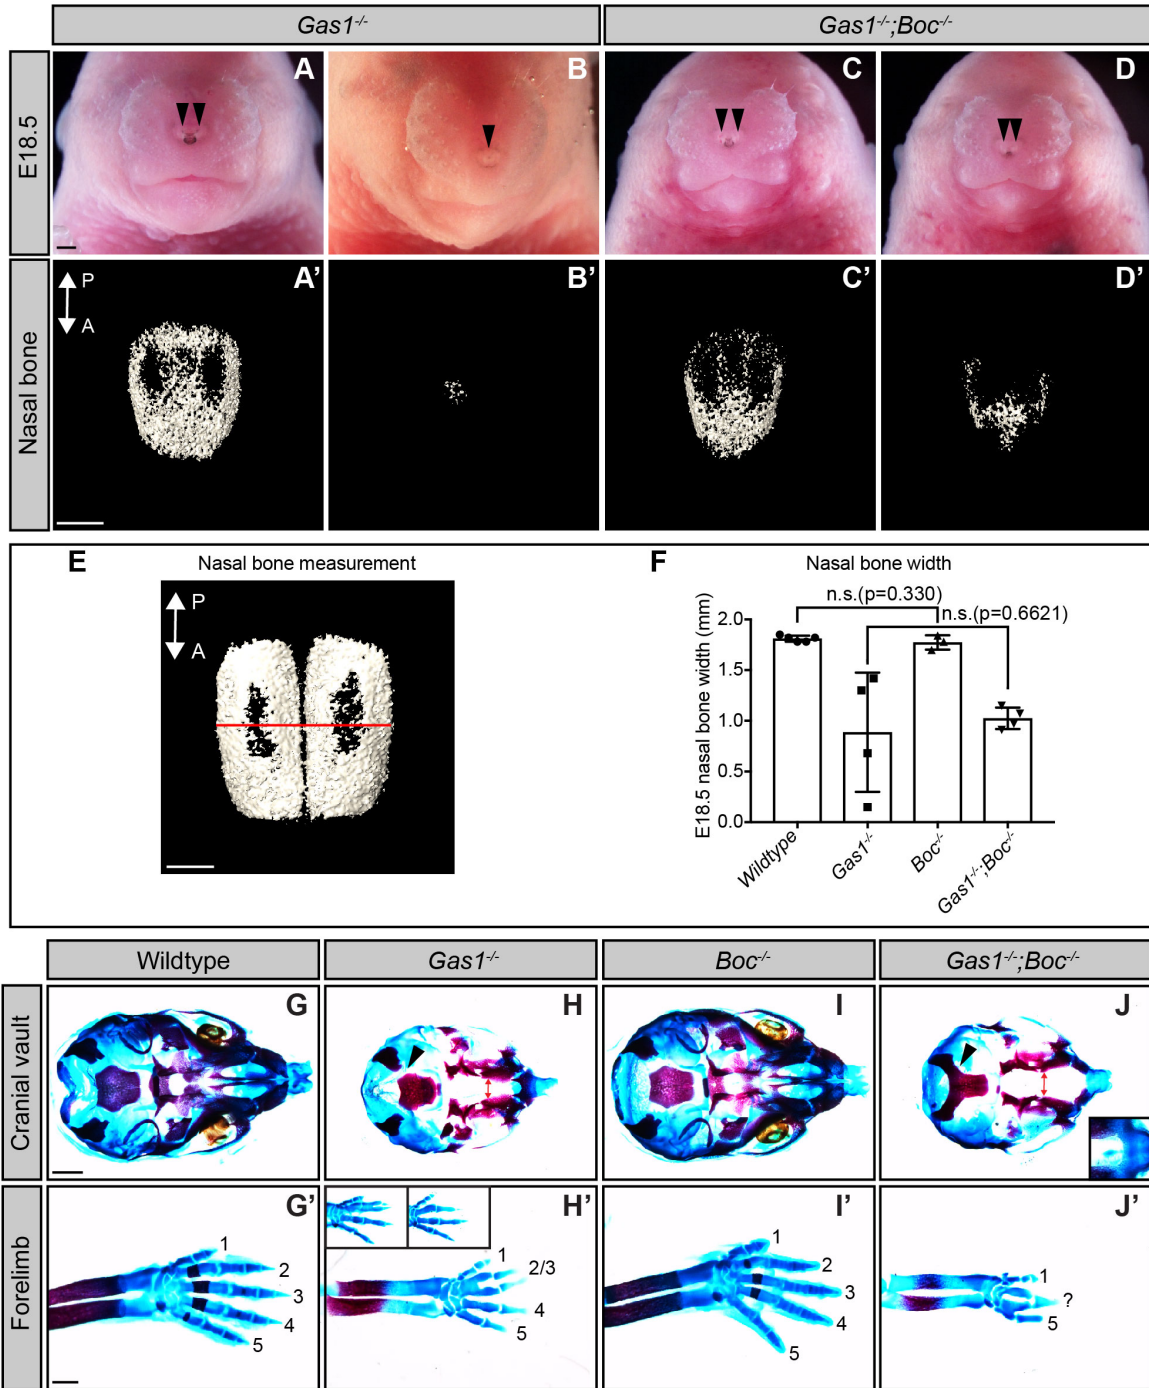

**Figure S8. HPE phenotypes and digit specification defects in E18.5 *Gas1*;*Boc* mutant embryos.**

*En face* view of E18.5 *Gas1<sup>-/-</sup>* (A,B) and *Gas1<sup>-/-</sup>;Boc<sup>-/-</sup>* (C,D) embryos. Black arrowheads denote the nasal pits. Three dimensional reconstructions of microCT images of isolated nasal bones from E18.5 *Gas1<sup>-/-</sup>* (A',B') and *Gas1<sup>-/-</sup>;Boc<sup>-/-</sup>* (C',D') embryos. A←→P specifies the anterior to posterior axis in (A'-D',E). MicroCT image of an isolated nasal bone from E18.5 wildtype embryo (E); the red horizontal line denotes the nasal bone width. Nasal bone width quantitation in wildtype (n=5), *Gas1<sup>-/-</sup>* (n=4), *Boc<sup>-/-</sup>* (n=3), and *Gas1<sup>-/-</sup>;Boc<sup>-/-</sup>* (n=4) embryos (F). Data are

mean±s.d. P-values were determined by a two-tailed Student's *t*-test. The Bonferroni correction was employed to account for multiple comparisons in each dataset; (F) non-significant (n.s.;  $p>0.0250$ ), significant ( $p\leq 0.0250$ ). Ventral views of E18.5 cranial vaults from wildtype (G), *Gas1*<sup>-/-</sup> (H), *Boc*<sup>-/-</sup> (I), and *Gas1*<sup>-/-</sup>;*Boc*<sup>-/-</sup> (J) embryos, stained with Alcian Blue and Alizarin Red. Red double arrows denote the cleft palate in *Gas1*<sup>-/-</sup> and *Gas1*<sup>-/-</sup>;*Boc*<sup>-/-</sup> embryos and black arrowheads mark occipital bone. Inset in (J) indicates hypoplastic premaxilla in *Gas1*<sup>-/-</sup>;*Boc*<sup>-/-</sup> embryos. Forelimbs of E18.5 wildtype (G'), *Gas1*<sup>-/-</sup> (H'), *Boc*<sup>-/-</sup> (I'), and *Gas1*<sup>-/-</sup>;*Boc*<sup>-/-</sup> (J') embryos, stained with Alcian Blue and Alizarin Red. Numbers denote specific digits where 1 is the most anterior and 5 is the most posterior. Insets in (H') demonstrate variable digit specification phenotypes in *Gas1*<sup>-/-</sup> embryos, which display either partial fusion of digits two and three (left), or the absence of either digit two or three (right). *Gas1*<sup>-/-</sup>;*Boc*<sup>-/-</sup> embryos exhibit a more severe limb phenotype where only digits 1 and 5 can be clearly identified; a third, unidentified digit is labeled with a question mark (Allen et al., 2011). Scale bars (A,A',E,G',G'), 500  $\mu\text{m}$ .

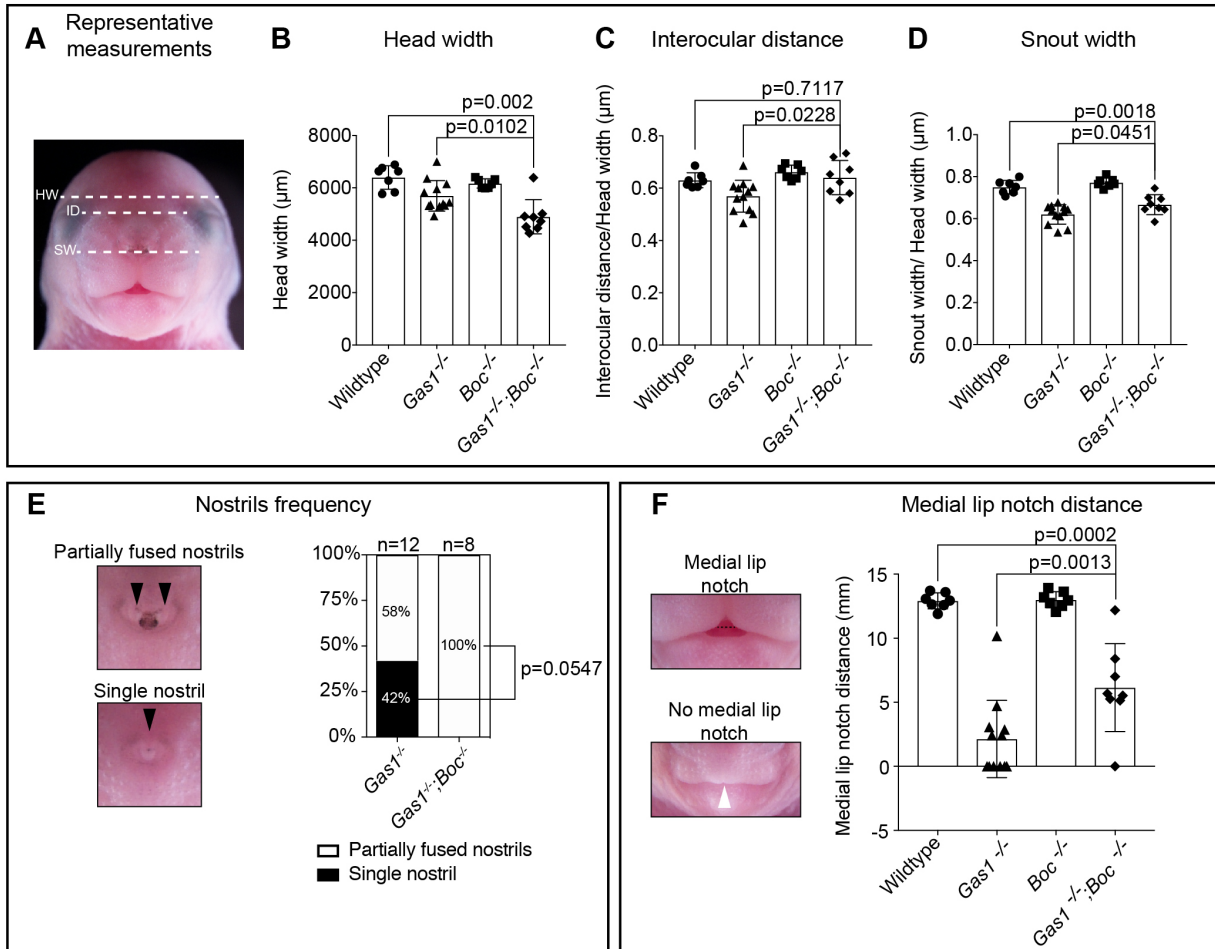

**Figure S9. E18.5 *Gas1*;*Boc* mutants display partially ameliorated midfacial defects.**

Quantitation of anatomical landmarks in E18.5 embryos (A-F). Representative measurements of head width (HW), interocular distance (ID), snout width (SW) in E18.5 embryos (A). White dotted lines denote the measured distance. Head width quantitation in wildtype ( $n=7$ ), *Gas1*<sup>-/-</sup> ( $n=12$ ), *Boc*<sup>-/-</sup> ( $n=7$ ) and *Gas1*<sup>-/-</sup>;*Boc*<sup>-/-</sup> ( $n=8$ ) embryos (B). Interocular distance quantitation, normalized to the head width in wildtype ( $n=7$ ), *Gas1*<sup>-/-</sup> ( $n=12$ ), *Boc*<sup>-/-</sup> ( $n=7$ ) and *Gas1*<sup>-/-</sup>;*Boc*<sup>-/-</sup> ( $n=8$ ) embryos (C). Snout width quantitation, normalized to the head width in wildtype ( $n=7$ ), *Gas1*<sup>-/-</sup> ( $n=12$ ) and *Gas1*<sup>-/-</sup>;*Boc*<sup>-/-</sup> ( $n=8$ ) embryos (D). Nostril frequency in *Gas1*<sup>-/-</sup> ( $n=12$ ) and *Gas1*<sup>-/-</sup>;*Boc*<sup>-/-</sup> ( $n=8$ ) embryos (E). Left panel, representative images of two partially fused nostrils and a single nostril. Black arrowheads denote two nostrils and a single nostril. Right panel, observed nostril frequency. Medial lip notch distance quantitation in wildtype ( $n=7$ ), *Gas1*<sup>-/-</sup> ( $n=12$ ), *Boc*<sup>-/-</sup> ( $n=7$ ) and *Gas1*<sup>-/-</sup>;*Boc*<sup>-/-</sup> ( $n=8$ ) embryos (F). Left panel, representative images of medial lip notch and no medial lip notch. Right panel, medial lip notch quantitation. White arrowhead denotes the lack of a medial lip notch. Data are mean±s.d. P-values were determined by a two-tailed Student's *t*-test (B-D, F) or a Fisher's Exact test (E). The Bonferroni correction was employed to account for multiple comparisons in (B-D, F); (n.s.;  $p>0.0250$ ), significant ( $p\leq 0.0250$ ).

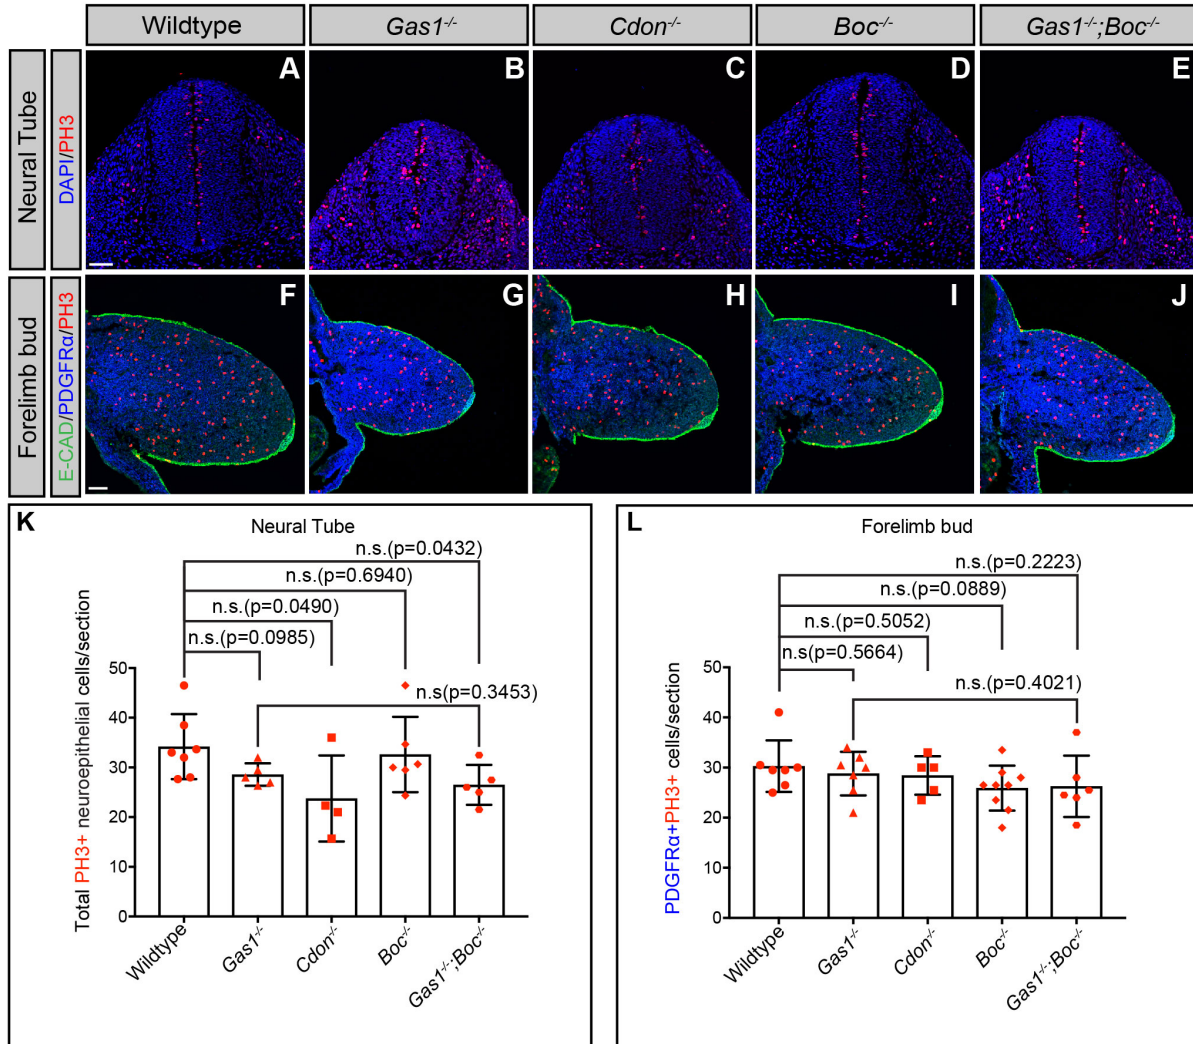

**Figure S10. *Boc* does not contribute to neural tube or forelimb mesenchyme proliferation.**

Immunofluorescent analysis of proliferation in E10.5 neural tube (A-E) and forelimb (F-J) transverse sections from E10.5, wildtype (A,F), *Gas1*<sup>-/-</sup> (B,G), *Cdon*<sup>-/-</sup> (C,H), *Boc*<sup>-/-</sup> (D,I), and *Gas1*<sup>-/-</sup>;*Boc*<sup>-/-</sup> (E,J) embryos. Antibody detection of E-CADHERIN (E-CAD, green, F-J), PDGFR $\alpha$  (blue, F-J), and phospho-histone H3 (PH3, red, A-J). Nuclei are stained with DAPI (blue, A-E). Quantitation of PH3+ cells (2 sections/embryo) in the neural tube (K) from E10.5 wildtype (n=7), *Gas1*<sup>-/-</sup> (n=5), *Cdon*<sup>-/-</sup> (n=4), *Boc*<sup>-/-</sup> (n=6) and *Gas1*<sup>-/-</sup>;*Boc*<sup>-/-</sup> (n=5) embryos. Quantitation of PH3+ cells (2 sections/limb) in forelimb buds (L) from E10.5 wildtype (n=7), *Gas1*<sup>-/-</sup> (n=7), *Cdon*<sup>-/-</sup> (n=5), *Boc*<sup>-/-</sup> (n=9) and *Gas1*<sup>-/-</sup>;*Boc*<sup>-/-</sup> (n=6) embryos. Data are mean $\pm$ s.d. P-values were determined by a two-tailed Student's *t*-test. The Bonferroni correction was employed to account for multiple comparisons in each dataset; (K-L) non-significant (n.s.;  $p > 0.0125$ ), significant ( $p \leq 0.0125$ ). Scale bars (A,F), 50  $\mu$ m.

Table S1. General Reagents

| Reagent                                               | Vendor                   | Catalog number |
|-------------------------------------------------------|--------------------------|----------------|
| Alcian Blue                                           | Millipore Sigma          | A5268          |
| Alizarin Red                                          | Millipore Sigma          | A5533          |
| Amersham ECL Prime Western Blotting Detection Reagent | GE Healthcare            | RPN2232        |
| Anti-Digoxigenin-Ap, Fab fragments                    | Roche                    | 11 093 274 910 |
| BM purple                                             | Roche                    | 11442074001    |
| BSA                                                   | Millipore Sigma          | A7906          |
| Complete mini Protease Inhibitor Cocktail             | Roche                    | 1836153        |
| DAPI                                                  | Thermo Fisher Scientific | D1306          |
| EGTA                                                  | Millipore Sigma          | E3889          |
| EDTA                                                  | Thermo Fisher Scientific | S311-500       |
| Fast green                                            | Millipore Sigma          | EM-4510        |
| Formaldehyde                                          | VWR                      | EMD-FX0410-5   |
| Formamide                                             | Millipore Sigma          | 4650-500ML     |
| Glacial Acetic Acid                                   | Thermo Fisher Scientific | BP2401-500     |
| Glutaraldehyde                                        | Millipore Sigma          | G5882          |
| Glycerol                                              | VWR                      | EMGX0185-5     |
| Goat serum                                            | Thermo Fisher Scientific | 16210064       |
| High capacity cDNA reverse transcription kit          | Applied Biosystems       | 4368814        |
| Hyblot CL Autoradiography Film                        | Denville                 | E3018          |
| Igepal (NP-40)                                        | Millipore Sigma          | I8896          |
| Immu-mount                                            | Thermo Fisher Scientific | 9990412        |
| Immuno-Blot PVDF membranes                            | Bio-Rad                  | 162-0177       |
| K <sub>3</sub> Fe(CN) <sub>6</sub>                    | Millipore Sigma          | PX1455         |
| K <sub>4</sub> Fe(CN) <sub>6</sub>                    | Millipore Sigma          | P9387          |
| MgCl <sub>2</sub>                                     | VWR                      | 0288-500G      |
| NaCl                                                  | Millipore Sigma          | SX0420-3       |
| Na deoxycholate                                       | VWR                      | SX0480-2       |
| OCT                                                   | Thermo Fisher Scientific | 23730571       |
| Paraformaldehyde                                      | Thermo Fisher Scientific | 50980489       |
| Permount                                              | Thermo Fisher Scientific | SP15100        |
| Pierce BCA protein assay kit                          | Thermo Fisher Scientific | PI23225        |

|                               |                    |             |
|-------------------------------|--------------------|-------------|
| Polyethyleneglycol            | Millipore Sigma    | 91893-1L-F  |
| Potassium hydroxide           | VWR                | PX1490-1    |
| PowerUP SYBR Green Master Mix | Applied Biosystems | A25742      |
| Proteinase K                  | Roche              | 03115836001 |
| Quick-RNA micro prep          | Zymo Research      | R1055       |
| Sheep serum                   | Bioworld           | 30611168-1  |
| Tris                          | VWR                | JT4109-2    |
| Triton X-100                  | VWR                | 9410        |
| Tween-20                      | VWR                | 9480        |
| X-gal                         | Goldbio            | X4281C      |
| Xylenes                       | VWR                | XX00555     |

Table S2. Primary and secondary antibodies used for immunofluorescence

| Primary antibodies                      | Vendor                               | Catalog number | Dilution |
|-----------------------------------------|--------------------------------------|----------------|----------|
| NKX2.1 (rabbit IgG)                     | Abcam                                | ab76013        | 1:200    |
| E-CADHERIN (mouseIgG2a)                 | BD Biosciences                       | 610181         | 1:500    |
| NKX2.2 (mouseIgG2b)                     | Developmental Studies Hybridoma Bank | 74.5A5         | 1:20     |
| OLIG2 (rabbit IgG)                      | Millipore Sigma                      | AB9610         | 1:2,000  |
| NKX6.1 (mouseIgG1)                      | Developmental Studies Hybridoma Bank | F55A10         | 1:20     |
| Phospho-histone H3 (rabbit IgG)         | Millipore Sigma                      | 06-570         | 1:1,000  |
| Phospho-histone H3 (mouse IgG1)         | Cell Signaling Technology            | 9706S          | 1:100    |
| PDGFR $\alpha$ (rabbit IgG)             | Cell Signaling Technology            | 3174S          | 1:100    |
| Secondary antibodies                    | Vendor                               | Catalog number | Dilution |
| Alexa Fluor 488 (Goat anti-Rabbit IgG)  | Thermo Fisher Scientific             | A-11008        | 1:500    |
| Alexa Fluor 555 (Goat anti-Mouse IgG2b) |                                      | A-21147        |          |
| Alexa Fluor 488 (Goat anti-Mouse IgG2a) |                                      | A-21131        |          |
| Alexa Fluor 555- (Goat anti-Rabbit IgG) |                                      | A-21428        |          |
| Alexa Fluor 488 (Goat anti-Mouse IgG1)  |                                      | A-21121        |          |
| Alexa Fluor 555 (Goat anti-Mouse IgG2a) |                                      | A-21137        |          |
| Alexa Fluor 647 (Goat anti-Mouse IgG1)  |                                      | A-21240        |          |

Table S3. Western Blot antibodies

| Primary antibodies                                                       | Vendor                    | Catalog number | Dilution |
|--------------------------------------------------------------------------|---------------------------|----------------|----------|
| Gli1 (V812) (rabbit IgG)                                                 | Cell Signaling Technology | #2354          | 1:1,000  |
| Vinculin (E1E9V) XP (rabbit IgG)                                         | Cell Signaling Technology | #13901         | 1:1,000  |
| Secondary antibodies                                                     | Vendor                    | Catalog number | Dilution |
| Peroxidase conjugated AffiniPure F(ab)2 Fragment Donkey Anti- Rabbit IgG | Jackson ImmunoResearch    | 711-036-152    | 1:10,000 |



Table S4. qRT-PCR Primers

| Gene           | Sequence             | Source                     |
|----------------|----------------------|----------------------------|
| <i>Gli1-F</i>  | GTGCACGTTTGAAGGCTGTC | (Han et al., 2017)         |
| <i>Gli1-R</i>  | GAGTGGGTCCGATTCTGGTG |                            |
| <i>Gapdh-F</i> | GGTGAAGGTCGGTGTGAACG | (Lewandowski et al., 2015) |
| <i>Gapdh-R</i> | CTCGCTCCTGGAAGATGGTG |                            |

## Supplementary Information References

- Allen, B. L., Song, J. Y., Izzi, L., Althaus, I. W., Kang, J. S., Charron, F., Krauss, R. S. and McMahon, A. P.** (2011). Overlapping roles and collective requirement for the coreceptors GAS1, CDO, and BOC in SHH pathway function. *Dev Cell* **20**, 775-787.
- Han, Y., Xiong, Y., Shi, X., Wu, J., Zhao, Y. and Jiang, J.** (2017). Regulation of Gli ciliary localization and Hedgehog signaling by the PY-NLS/karyopherin-beta2 nuclear import system. *PLoS Biol* **15**, e2002063.
- Lewandowski, J. P., Du, F., Zhang, S., Powell, M. B., Falkenstein, K. N., Ji, H. and Vokes, S. A.** (2015). Spatiotemporal regulation of GLI target genes in the mammalian limb bud. *Dev Biol* **406**, 92-103.
